# Supplementary material
Source: HighWire-hosted journal article supplement (http://www.jneurosci.org/highwire/filestream/602306/field_highwire_adjunct_files/0/Supplemental_Figure.pdf)
Supplement: Supplemental_Figure.pdf [file Supplemental_Figure.pdf]

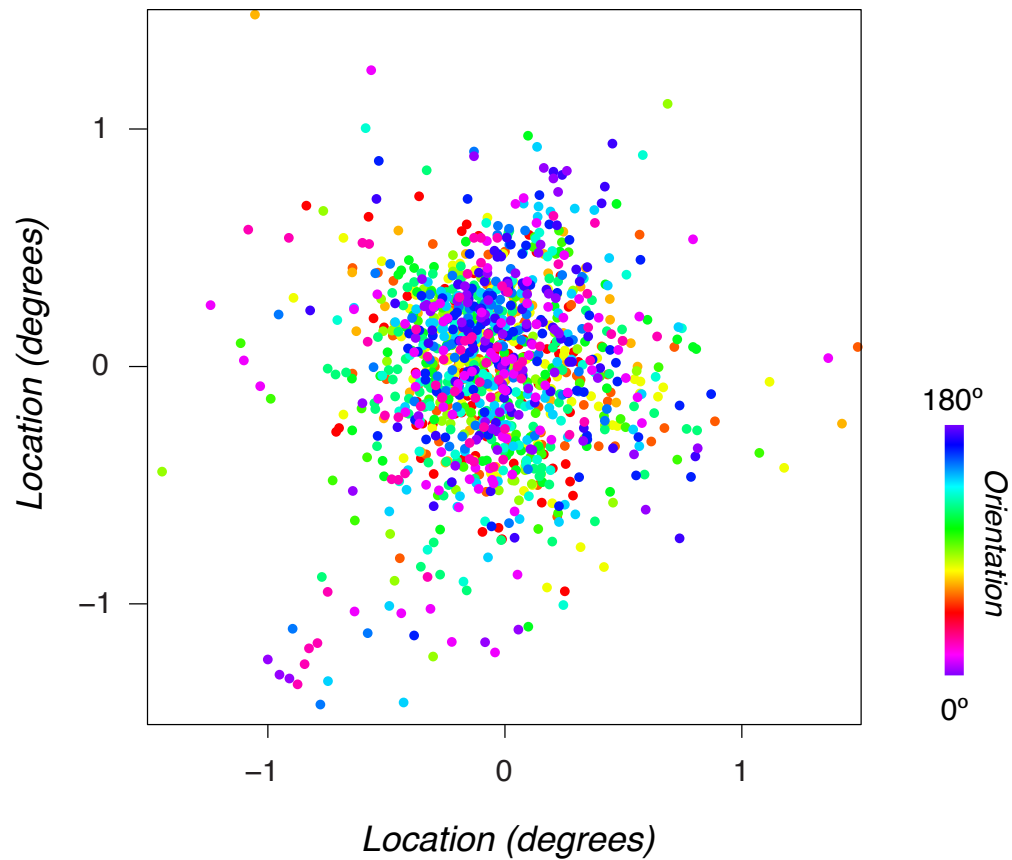

**Supplementary Figure 1.** Orientation maps were not due to eye movements. In one orientation mapping session, we measured gaze positions during the fMRI experiment; corresponding fMRI data from this session are shown in Figure 1a. 99% of gaze positions were within 1.5 deg of the center visual field. Each dot corresponds to a period of stable fixation, and the color of each dot indicates the stimulus orientation during that period of fixation. There was no evidence for a circular correlation between the polar angle of fixations and the orientation of the stimulus ( $r_c = -0.027$ ,  $P = 0.1220$ ).
